# Supplementary material
Source: ML conference proceedings conference paper supplement (https://proceedings.mlr.press/v119/chu20b.html)
Supplement: Supplementary file [file chu20b-supp.pdf]

---

# Supplementary Material for: Semismooth Newton Algorithm for Efficient Projections onto $\ell_{1,\infty}$ -norm Ball

---

Dejun Chu<sup>1</sup> Changshui Zhang<sup>1</sup> Shiliang Sun<sup>2</sup> Qing Tao<sup>3</sup>

## 1. Proof of Proposition 1

**Proposition 1** *Let  $s(\theta)$  be defined by (12). Then  $s(\theta)$  is convex, strictly monotonically decreasing with  $dm + 1$  breakpoints at most, and the equation (11) has unique root on the interval  $[0, \max_i \sum_{j=1}^m A_{i,j}]$ .*

**Proof:** All the breakpoints are given by (9), in which  $\mu_i$  is 0 or equal to each element of the  $i$ -th row of data matrix  $\mathbf{A}$ . Thus,  $s(\theta)$  has  $dm + 1$  breakpoints at most.

Meanwhile, it is clear that for all  $i$ ,  $\tilde{\mu}_i(\theta)$  is convex, continuous and monotonically decreasing in  $[0, \max_i \sum_{j=1}^m A_{i,j}]$  with respect to  $\theta$ , and strictly monotonically decreasing in  $[0, \sum_{j=1}^m A_{i,j}]$ . Therefore,  $s(\theta)$  is convex and strictly monotonically decreasing in  $[0, \max_i \sum_{j=1}^m A_{i,j}]$ .

It is easily verified that  $\mu_i = \max_j A_{i,j}$  given  $\theta = 0$ . Thus, we have  $s(0) > 0$  from the assumption of the problem (4), and  $s(\theta_{\max}) = -C < 0$  where  $\theta_{\max} = \max_i \sum_{j=1}^m A_{i,j}$ . According to the Intermediate Value Theorem,  $s(\theta)$  has unique root on the interval  $[0, \max_i \sum_{j=1}^m A_{i,j}]$ . ■

## 2. Proof of Proposition 2

**Proposition 2** *Assume  $|\mathcal{I}(\mu_i^{(t)})| \geq 1$  for  $i = 1, 2, \dots, d$ . Then  $v_{d+1}^{(t)}$  is the Newton step for  $s(\theta)$  at  $\theta^{(t)}$ .*

**Proof:** Substituting (19) into (20), we can rewrite the last element of  $\mathbf{v}$  as

$$\begin{aligned}
 v_{d+1}^{(t)} &= \frac{-F_{d+1} + \sum_{i=1}^d \frac{F_i}{|\mathcal{I}(\mu_i^{(t)})|}}{\sum_{i=1}^d 1/|\mathcal{I}(\mu_i^{(t)})|} \\
 &= \frac{\sum_{i=1}^d \mu_i^{(t)} - C + \sum_{i=1}^d \frac{\sum_j \max(A_{i,j} - \mu_i^{(t)}, 0) - \theta^{(t)}}{|\mathcal{I}(\mu_i^{(t)})|}}{\sum_{i=1}^d 1/|\mathcal{I}(\mu_i^{(t)})|} \\
 &= \frac{\sum_{i=1}^d \frac{\sum_{j \in \mathcal{I}(\mu_i^{(t)})} A_{i,j} - \theta^{(t)}}{|\mathcal{I}(\mu_i^{(t)})|} - C}{\sum_{i=1}^d 1/|\mathcal{I}(\mu_i^{(t)})|} \\
 &= \frac{\sum_{i=1}^d \tilde{\mu}_i(\theta^{(t)}) - C}{\sum_{i=1}^d 1/|\mathcal{I}(\mu_i^{(t)})|} \\
 &= -\frac{s(\theta^{(t)})}{s'(\theta^{(t)})}.
 \end{aligned}$$

Thus,  $v_{d+1}^{(t)}$  is the Newton step at  $\theta^{(t)}$  for the search direction of (11). ■

. Correspondence to: Changshui Zhang <zcs@mail.tsinghua.edu.cn>.

### 3. Proof of Proposition 3

**Proposition 3** Suppose  $\theta^{(t)}$  lies between two breakpoints, i.e.,  $\theta^{(t)} \in (\Theta_{[j-1]}, \Theta_{[j]})$ . Assume  $s(\Theta_{[j]}) > 0$ . There holds

$$\theta^{(t)} \leq \Theta_{[j]} < \theta^{(t+1)}.$$

**Proof:** We focus on the right inequality while the left one is obvious. From the update of  $\theta$ , we obtain

$$\theta^{(t+1)} = \theta^{(t)} + \frac{\sum_{i=1}^d \tilde{\mu}_i(\theta^{(t)}) - C}{\sum_{i=1}^d 1/|\mathcal{I}(\mu_i^{(t)})|}.$$

Recalling the definition of  $\tilde{\mu}_i(\theta^{(t)})$ , we have

$$\theta^{(t+1)} = \frac{\sum_{i=1}^d \frac{\sum_{j \in \mathcal{I}(\mu_i^{(t)})} A_{i,j}}{|\mathcal{I}(\mu_i^{(t)})|} - C}{\sum_{i=1}^d 1/|\mathcal{I}(\mu_i^{(t)})|}.$$

If  $s(\Theta_{[j]}) > 0$ , we have  $s(\theta^{(t)}) > 0$  since  $s(\theta)$  is a strictly monotonically decreasing function. Meanwhile,

$$s(\Theta_{[j]}) = \sum_{i=1}^d \frac{\sum_{j \in \mathcal{I}(\mu_i^{(t)})} A_{i,j}}{|\mathcal{I}(\mu_i^{(t)})|} - \Theta_{[j]} \sum_{i=1}^d \frac{1}{|\mathcal{I}(\mu_i^{(t)})|} - C > 0.$$

This means that

$$\Theta_{[j]} < \frac{\sum_{i=1}^d \frac{\sum_{j \in \mathcal{I}(\mu_i^{(t)})} A_{i,j}}{|\mathcal{I}(\mu_i^{(t)})|} - C}{\sum_{i=1}^d 1/|\mathcal{I}(\mu_i^{(t)})|} = \theta^{(t+1)}.$$

### 4. Proof of Proposition 4

**Proposition 4** Assume  $\mu_i^{(t)}$  is updated via (23) for  $t \geq 0$ . Then we have

$$\sum_{i=1}^d \mu_i^{(t+1)} - C = 0.$$

**Proof:** From the update of  $\theta^{(t)}$ , we have

$$\theta^{(t+1)} = \left( \sum_i \frac{\sum_{j \in \mathcal{I}(\mu_i^{(t)})} A_{i,j}}{|\mathcal{I}(\mu_i^{(t)})|} - C \right) / \sum_i 1/|\mathcal{I}(\mu_i^{(t)})|,$$

which means

$$\begin{aligned} & \sum_i \frac{\sum_{j \in \mathcal{I}(\mu_i^{(t)})} A_{i,j}}{|\mathcal{I}(\mu_i^{(t)})|} - \theta^{(t+1)} \sum_i \frac{1}{|\mathcal{I}(\mu_i^{(t)})|} - C = 0 \\ \Leftrightarrow & \sum_i \frac{\sum_{j \in \mathcal{I}(\mu_i^{(t)})} A_{i,j} - \theta^{(t+1)} |\mathcal{I}(\mu_i^{(t)})|}{|\mathcal{I}(\mu_i^{(t)})|} - C = 0 \\ \Leftrightarrow & \sum_{i=1}^d \mu_i^{(t+1)} - C = 0 \end{aligned}$$

## 5. Proof of Lemma 2

**Lemma 2** Assume that  $\mu_i^{(t)} \in [0, \max_j A_{i,j}]$ ,  $\theta^{(t)} \geq 0$  and the following two inequalities hold:

(i)  $\sum_{j=1}^m \max(A_{i,j} - \mu_i^{(t)}, 0) \geq \theta^{(t)}$ , (ii)  $s(\theta^{(t)}) \geq 0$ , then it can be obtained that

$$\sum_{j=1}^m \max(A_{i,j} - \mu_i^{(t+1)}, 0) \geq \theta^{(t+1)}.$$

**Proof:** According to the inequality (i), we have

$$\begin{aligned} & \sum_{j \in \mathcal{I}(\mu_i^{(t)})} A_{i,j} - |\mathcal{I}(\mu_i^{(t)})| \mu_i^{(t)} - \theta^{(t)} \geq 0 \\ \Leftrightarrow & \sum_{j \in \mathcal{I}(\mu_i^{(t)})} A_{i,j} \geq |\mathcal{I}(\mu_i^{(t)})| \mu_i^{(t)} + \theta^{(t)}. \end{aligned}$$

Meanwhile, from the definition of  $\mathcal{I}(\mu_i^{(t)})$  and using

$$\mu_i^{(t+1)} = \frac{\sum_{j \in \mathcal{I}(\mu_i^{(t)})} A_{i,j} - \theta^{(t+1)}}{|\mathcal{I}(\mu_i^{(t)})|},$$

it can be obtained

$$\begin{aligned} & \sum_{j=1}^m \max\{A_{i,j} - \mu_i^{(t+1)}, 0\} - \theta^{(t+1)} \\ &= \sum_{j=1}^m \max\left\{A_{i,j} - \frac{\sum_{k \in \mathcal{I}(\mu_i^{(t)})} A_{i,k} - \theta^{(t+1)}}{|\mathcal{I}(\mu_i^{(t)})|}, 0\right\} - \theta^{(t+1)} \\ &\geq \sum_{j \in \mathcal{I}(\mu_i^{(t)})} A_{i,j} - |\mathcal{I}(\mu_i^{(t)})| \frac{\sum_{j \in \mathcal{I}(\mu_i^{(t)})} A_{i,j} - \theta^{(t+1)}}{|\mathcal{I}(\mu_i^{(t)})|} - \theta^{(t+1)} \\ &= 0. \end{aligned}$$

## 6. Proof of Corollary 1

**Corollary 1** Assume that  $\sum_{j=1}^m \max(A_{i,j} - \mu_i^{(t)}, 0) \geq \theta^{(t)}$ . Then we can obtain

$$\tilde{\mu}_i(\theta^{(t)}) \geq \mu_i^{(t)}.$$

**Proof:** From the definition of  $\tilde{\mu}_i(\theta^{(t)})$ , we have

$$\begin{aligned} \tilde{\mu}_i(\theta^{(t)}) &= \frac{\sum_{j \in \mathcal{I}(\mu_i^{(t)})} A_{i,j} - \theta^{(t)}}{|\mathcal{I}(\mu_i^{(t)})|} \\ &= \mu_i^{(t)} + \frac{\sum_{j \in \mathcal{I}(\mu_i^{(t)})} A_{i,j} - |\mathcal{I}(\mu_i^{(t)})| \mu_i^{(t)} - \theta^{(t)}}{|\mathcal{I}(\mu_i^{(t)})|} \\ &\geq \mu_i^{(t)}. \end{aligned}$$

The last inequality comes from the assumption which concludes the proof. ■
